# Supplementary material
Source: PubMed Central journal article supplement (PMC2948849)
Supplement: NIHMS230487-supplement-Figure_E1.pdf [file NIHMS230487-supplement-Figure_E1.pdf]

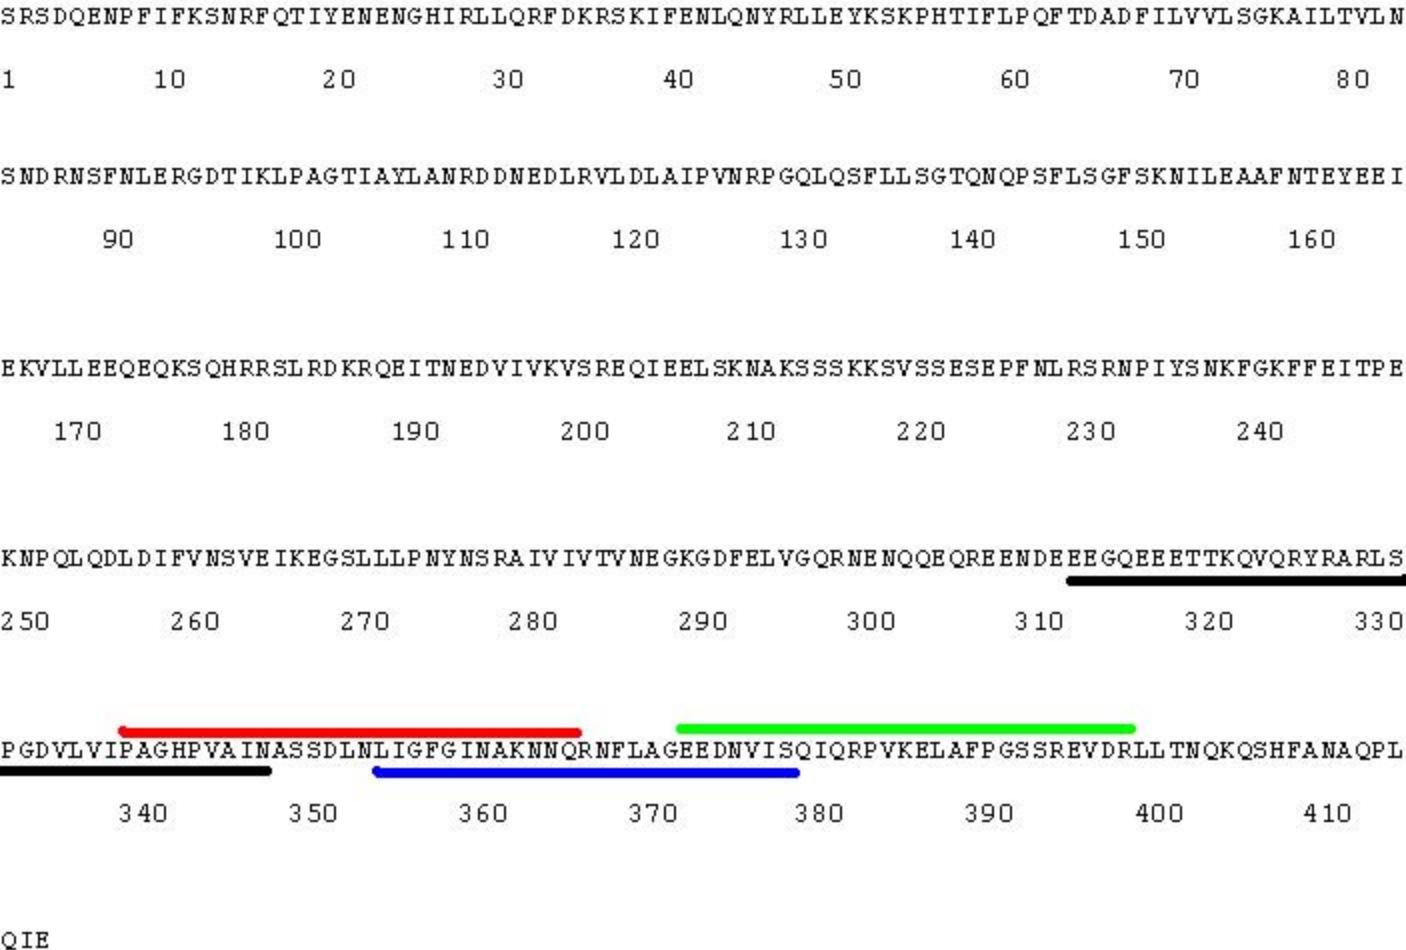

FIG E1.: Location of the four defined epitopes on the len c 1 sequence. The defined epitopes have partly overlapping sequences.

Epitope 1 (EEGQEEETTKQVQRYRARLSPGDVLVIPAGHPVAIN) —

Epitope 2 (PAGHPVAINASSDLNLIGFGINAKNNQ) —

Epitope 3 (LIGFGINAKNNQRNFLAGEEDNVIS) —

Epitope 4 (EEDNVISQIQRPVKELAFPGSSREVD) —
